# Supplementary material for: Heterologous expression analyses of rice OsCAS in Arabidopsis and in yeast provide evidence for its roles in cyanide detoxification rather than in cysteine synthesis in vivo
Source: PubMed Central journal article supplement — J Exp Bot. 2009 Jan 30;60(3):993–1008. doi: 10.1093/jxb/ern343 (PMC2652057; doi:10.1093/jxb/ern343), 2009-01-30
Supplement: ern343_1.pdf [file ern343_1.pdf]

## SUPPLEMENTAL MATERIAL

### Title

Heterologous expression analyzes of rice *OsCAS* in Arabidopsis and in yeast provide evidences for its roles in cyanide detoxification rather than in cysteine synthesis *in vivo*.

### Authors' full names

Kwok Wai Lai<sup>1</sup>, Chi Ping Yau<sup>1</sup>, Yu Chung Tse<sup>2</sup>, Liwen Jiang<sup>2</sup>, Wing Kin Yip<sup>1</sup>

### *Institute addresses*

<sup>1</sup>*School of Biological Sciences, The University of Hong Kong, Pokfulam Road, Hong Kong, China.*

<sup>2</sup>*Department of Biology and Molecular Biotechnology Program, Chinese University of Hong Kong, Shatin, New Territories, Hong Kong, China*

### Information of corresponding author

#### Name

Wing Kin Yip

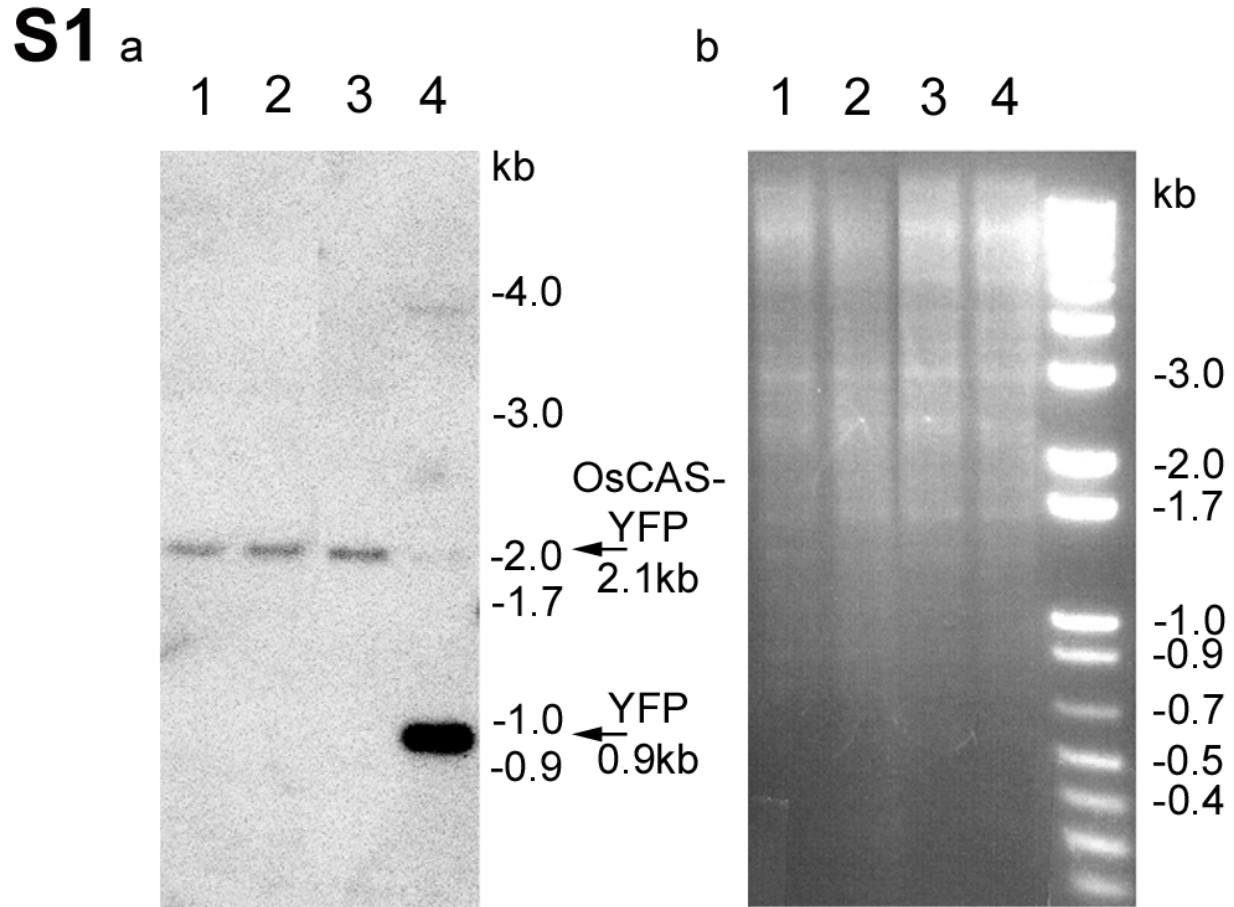

**Figure S1** Integrations of OsCAS-YFP and YFP encoding sequences in Arabidopsis genome were analyzed by Southern blotting. Eight micrograms of genomic DNA from OsCAS-YFP lines including line 1, 4 and 5 (lane 1 to 3) and YFP transgenic line (lane 4) digested with *EcoRV* and *SacI* and probed with a  $^{32}\text{P}$ -labelled YFP fragment (A). Digested genomic DNAs from these lines were separated in 0.8% agarose gel (B).

**Table S1** Results of the protein identities for immuno- purified proteins by database searching

| Mass, <i>m/z</i><br>submitted                                                         | Monoproton<br>ated masses,<br>MH <sup>+</sup><br>matched | Delta<br>ppm | Modifi-<br>cation | Residue<br>matched | Prosposed peptide sequence | Sequence<br>coverage<br>(%) | MOWSE score |
|---------------------------------------------------------------------------------------|----------------------------------------------------------|--------------|-------------------|--------------------|----------------------------|-----------------------------|-------------|
| <b>Protein band 1</b>                                                                 |                                                          |              |                   |                    |                            | 28                          | 2.86e+05    |
| Beta-cyanoalanine synthase (40154 Da; pI 8.4)                                         |                                                          |              |                   |                    |                            |                             |             |
| (Accession No. AY720933)                                                              |                                                          |              |                   |                    |                            |                             |             |
| 1186.6991                                                                             | 1186.6683                                                | 26           |                   | 296-306            | (K) VLEVKGEDAVK (M)        |                             |             |
| 1215.7026                                                                             | 1215.6810                                                | 33           |                   | 58-68              | (K) IRDSASQLIGR (T)        |                             |             |
| 1327.7301                                                                             | 1327.6898                                                | 30           |                   | 355-365            | (R) YLSSALFEELR (A)        |                             |             |
| 1474.7654                                                                             | 1474.7212                                                | 30           |                   | 100-112            | (K) DRPAISMLED A EK (K)    |                             |             |
| 1481.9455                                                                             | 1481.9055                                                | 27           |                   | 341-354            | (K) GKLIVTVLPSLGER (Y)     |                             |             |
| 1490.7468                                                                             | 1490.7161                                                | 21           | Met-ox            | 100-112            | (K) DRPAISMLED A EK (K)    |                             |             |
| 1560.8586                                                                             | 1560.8420                                                | 11           | Met-ox            | 169-183            | (K) LVLTDPTKGMGGTVR (K)    |                             |             |
| 1602.8591                                                                             | 1602.8161                                                | 27           |                   | 100-113            | (K) DRPALSML EDA EKK (G)   |                             |             |
| 1618.8295                                                                             | 1618.8110                                                | 11           | Met-ox            | 100-113            | (K) DRPALSML EDA EKK (G)   |                             |             |
| 1677.9906                                                                             | 1677.9580                                                | 19           |                   | 85-99              | (R) IAAKLEFQPSFSVK (D)     |                             |             |
| 1872.9688                                                                             | 1872.9417                                                | 14           |                   | 143-158            | (K) GYELILTMP SYSLER (R)   |                             |             |
| <b>Protein band 2</b>                                                                 |                                                          |              |                   |                    |                            | 43                          | 3.73e+08    |
| Large subunit of ribulose-1,5-bisphosphate carboxylase/ oxygenase; (52956 Da; pI 5.9) |                                                          |              |                   |                    |                            |                             |             |
| (Accession No. BAA84393)                                                              |                                                          |              |                   |                    |                            |                             |             |

|           |           |    |        |         |                                     |
|-----------|-----------|----|--------|---------|-------------------------------------|
| 1021.6002 | 1021.5318 | 67 |        | 33-41   | (K) DTDLAAFR (V)                    |
| 1154.6407 | 1154.5642 | 66 |        | 304-312 | (R) QKNHGMHFR (V)                   |
| 1187.7456 | 1187.6649 | 68 |        | 286-295 | (R) DNGLLLHIHR (A)                  |
| 1228.7384 | 1228.6537 | 69 |        | 436-446 | (R) DLAVEGNEIIR (E)                 |
| 1240.8140 | 1240.7377 | 61 |        | 129-139 | (K) ALAALRLEDLR (I)                 |
| 1249.7701 | 1249.6792 | 73 |        | 340-350 | (R) ESTLGFVDLLR (D)                 |
| 1407.7597 | 1407.6684 | 65 |        | 22-32   | (K) LTYYTPEYETK (D)                 |
| 1447.8646 | 1447.7658 | 68 |        | 320-334 | (R) LSGGDHIHAGTVVVGK (L)            |
| 1465.8621 | 1465.7522 | 73 |        | 147-159 | (K) TFQGPPHGIQVER (D)               |
| 1516.9731 | 1516.8674 | 70 |        | 165-177 | (K) YGRPLLGCTIKPK (L)               |
| 1546.8291 | 1546.7728 | 36 |        | 216-227 | (R) DRFLFCAEAIYK (S)                |
| 1820.0867 | 1819.9554 | 72 |        | 335-350 | (K) LEGDRESTLGFVDLLR (D)            |
| 1867.0361 | 1866.9125 | 66 |        | 464-479 | (K) EITFNFPTIDKLDGQE (-)            |
| 1965.0705 | 1964.9322 | 70 |        | 237-253 | (K) GHYLNATAGTCEEMIKR (A)           |
| 2170.1389 | 2169.9875 | 70 |        | 195-213 | (R) GGLDFTKDDENVNSQPFMR (W)         |
| 2186.1170 | 2185.9824 | 62 | Met-ox | 195-213 | (R) GGLDFTKDDENVNSQPFMR (W)         |
| 2410.3256 | 2410.1818 | 60 |        | 22-41   | (K) LTYYTPEYETKDTDILAAFR (V)        |
| 3052.6474 | 3052.4661 | 59 |        | 259-285 | (R) ELGVPIVMHDYLTGGFTANTSLSHYCR (D) |

---

**Protein band 3**

31

19089

Green fluorescent protein. RSGFP4 variant; (29253 Da; pI 6.1)

(Accession No. AAA79304.1)

|           |           |    |        |       |                     |
|-----------|-----------|----|--------|-------|---------------------|
| 1282.6946 | 1282.5738 | 94 | Met-ox | 86-96 | (K) SAMPEGYVQER (T) |
|-----------|-----------|----|--------|-------|---------------------|

|           |           |       |        |         |                                                       |
|-----------|-----------|-------|--------|---------|-------------------------------------------------------|
| 1503.7958 | 1503.6603 | 90    |        | 27-41   | (K) FSVSGEGEGDATYGK (L)                               |
| 1542.9446 | 1542.7916 | 99    |        | 127-140 | (K) GIDFKEDGNILGHK (L)                                |
| 1941.0797 | 1940.8965 | 94    |        | 81-96   | (R) H D F F K S A M P E G Y V Q E R (T)               |
| 1974.0768 | 1973.9067 | 86    |        | 141-156 | (K) L E Y N Y N S H N V Y M A D K (Q)                 |
| 1990.0665 | 1989.9017 | 83    | Met-ox | 141-156 | (K) L E Y N Y N S H N V Y M A D K (Q)                 |
| 2408.2491 | 2408.2511 | -0.82 |        | 53-73   | (K) L P V P W P T L V T T M G Y G V L C F S R (Y)     |
| 2437.4166 | 2437.2615 | 64    |        | 4-26    | (K) G E E L F T G V V P I L V E L D G D V N G H K (F) |
| 2664.4841 | 2664.3885 | 36    | AcetN  | 1-26    | (-) G K G E E T G V V P I L V E L D G D V N G H K (F) |

---
